# Supplementary material
Source: PubMed Central journal article supplement (PMC6467468)
Supplement: NIHMS1003661-supplement-Supp_Figures_and_Tables.pdf [file NIHMS1003661-supplement-Supp_Figures_and_Tables.pdf]

## Supplemental Figure 1

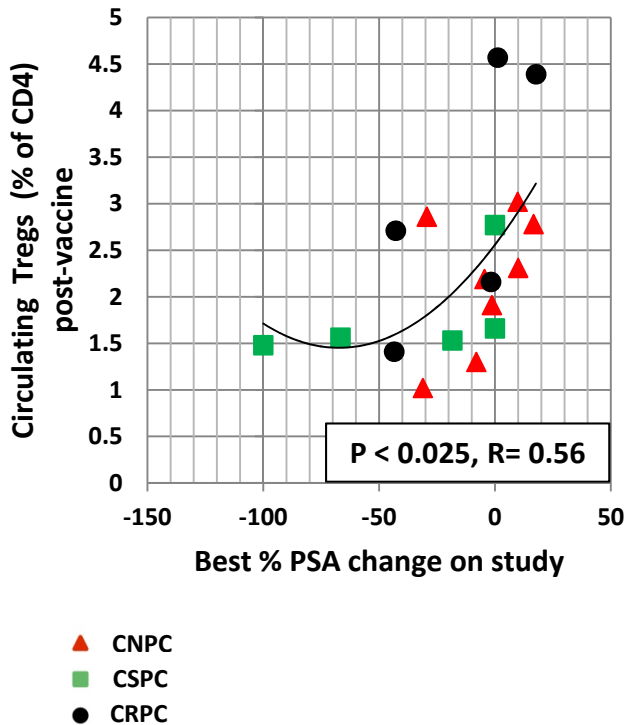

**Supplemental Figure 1. Low frequency of Tregs in PBMC post-vaccine correlated with decreased serum PSA values.** Nonlinear regression analysis by centered second order polynomial (quadratic) equation comparing best percentage PSA change on study vs. circulating Tregs (% of CD4) post-vaccine. Red triangles: castration-naïve prostate cancer patients (CNPC). Green squares: castration-sensitive prostate cancer patients (CSPC). Black circles: castration-resistant prostate cancer patients (CRPC).

## Supplemental Figure 2

*a*

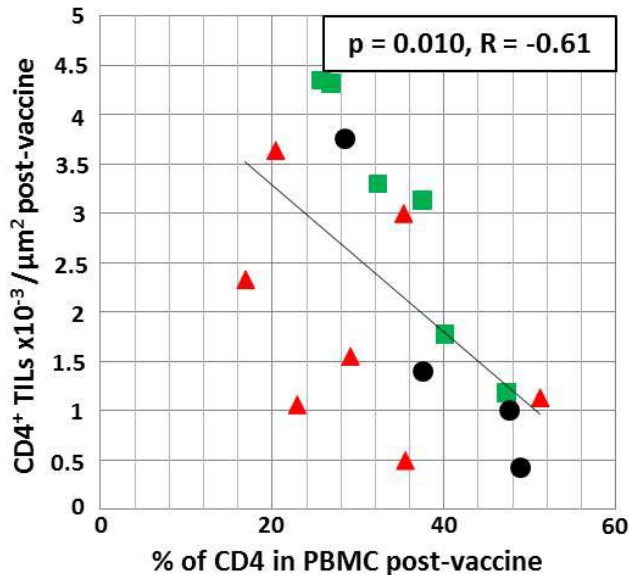

*b*

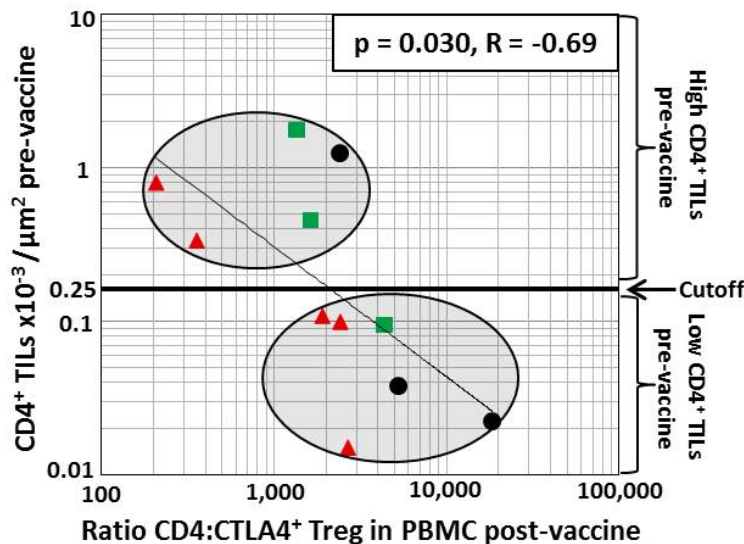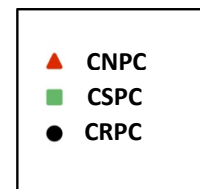

**Supplemental Figure 2. Low infiltration of CD4<sup>+</sup> TILs correlated with high CD4<sup>+</sup> circulating lymphocytes.** (a) Regression analysis between CD4<sup>+</sup> TILs post-vaccine and frequency of CD4<sup>+</sup> T lymphocytes in PBMCs post-vaccine. Linear regression line is shown. (b) Regression analysis between CD4<sup>+</sup> TILs pre-vaccine and ratio CD4<sup>+</sup> lymphocytes vs. highly suppressive CTLA4<sup>+</sup> Tregs in PBMCs post-vaccine. Patients were divided based on low or high CD4<sup>+</sup> TILs pre-vaccine, having as a cutoff  $0.25 \times 10^{-3}$  CD4<sup>+</sup> TILs /  $\mu\text{m}^2$ . Power regression line and cutoff for CD4<sup>+</sup> TILs high vs. low are shown. Red triangles: castration-naïve prostate cancer patients (CNPC). Green squares: castration-sensitive prostate cancer patients (CSPC). Black circles: castration-resistant prostate cancer patients (CRPC).

## Supplemental Table 1: Study Schematic

| Cohort  | Prime (Day 1)                                                          | Boosts (Days 28, 57, 88)                                               |                                                                        |
|---------|------------------------------------------------------------------------|------------------------------------------------------------------------|------------------------------------------------------------------------|
|         | s.c.                                                                   | i.t.                                                                   | s.c.                                                                   |
| 1 (n=3) | rV-PSA-TRICOM 2x10 <sup>8</sup> pfu<br>rF-GM-CSF 2x10 <sup>7</sup> pfu | rF-PSA-TRICOM 4x10 <sup>7</sup> pfu                                    |                                                                        |
| 2 (n=3) | rV-PSA-TRICOM 2x10 <sup>8</sup> pfu<br>rF-GM-CSF 2x10 <sup>7</sup> pfu | rF-PSA-TRICOM 4x10 <sup>8</sup> pfu                                    |                                                                        |
| 3 (n=3) | rV-PSA-TRICOM 2x10 <sup>8</sup> pfu<br>rF-GM-CSF 2x10 <sup>7</sup> pfu | rF-PSA-TRICOM 4x10 <sup>8</sup> pfu<br>rF-GM-CSF 1x10 <sup>7</sup> pfu |                                                                        |
| 4 (n=6) | rV-PSA-TRICOM 2x10 <sup>8</sup> pfu<br>rF-GM-CSF 2x10 <sup>7</sup> pfu | rF-PSA-TRICOM 4x10 <sup>8</sup> pfu<br>rF-GM-CSF 1x10 <sup>8</sup> pfu |                                                                        |
| 5 (n=6) | rV-PSA-TRICOM 2x10 <sup>8</sup> pfu<br>rF-GM-CSF 2x10 <sup>7</sup> pfu | rF-PSA-TRICOM 4x10 <sup>8</sup> pfu<br>rF-GM-CSF 1x10 <sup>8</sup> pfu | rF-PSA-TRICOM 4x10 <sup>8</sup> pfu<br>rF-GM-CSF 1x10 <sup>7</sup> pfu |

**s.c.:** subcutaneous; **i.t.:** intratumoral; **pfu:** plaque-forming units. Number of patients enrolled per cohort is shown.

## Supplemental Table 2: Immune Subsets of PBMC Analyzed by Flow Cytometry

|    |                                                                                                          |
|----|----------------------------------------------------------------------------------------------------------|
| 1  | CD4 <sup>+</sup>                                                                                         |
| 2  | CD4 <sup>+</sup> CTLA-4 <sup>+</sup>                                                                     |
| 3  | Central Memory CD4 <sup>+</sup> = CD45RA <sup>-</sup> CCR7 <sup>+</sup>                                  |
| 4  | Effector Memory CD4 <sup>+</sup> = CD45RA <sup>-</sup> CCR7 <sup>-</sup>                                 |
| 5  | Effector Memory CD4 <sup>+</sup> PD-1 <sup>+</sup>                                                       |
| 6  | Terminal (EMRA) CD4 <sup>+</sup> = CD45RA <sup>+</sup> CCR7 <sup>-</sup>                                 |
| 7  | Naïve CD4 <sup>+</sup> = CD45RA <sup>+</sup> CCR7 <sup>+</sup>                                           |
| 8  | Ratio CD4 <sup>+</sup> vs. CD8 <sup>+</sup>                                                              |
| 9  | CD8 <sup>+</sup>                                                                                         |
| 10 | CD8 <sup>+</sup> CTLA-4 <sup>+</sup>                                                                     |
| 11 | CD8 <sup>+</sup> PD-1 <sup>+</sup>                                                                       |
| 12 | CD8 <sup>+</sup> Tim-3 <sup>+</sup>                                                                      |
| 13 | Central Memory CD8 <sup>+</sup> = CD45RA <sup>-</sup> CCR7 <sup>+</sup>                                  |
| 14 | Effector Memory CD8 <sup>+</sup> = CD45RA <sup>-</sup> CCR7 <sup>-</sup>                                 |
| 15 | Terminal (EMRA) CD8 <sup>+</sup> = CD45RA <sup>+</sup> CCR7 <sup>-</sup>                                 |
| 16 | Naïve CD8 <sup>+</sup> = CD45RA <sup>+</sup> CCR7 <sup>+</sup>                                           |
| 17 | Tregs (% of CD4 <sup>+</sup> )= CD4 <sup>+</sup> CD25 <sup>+</sup> FoxP3 <sup>+</sup> CD127 <sup>-</sup> |
| 18 | Treg CTLA-4 <sup>+</sup>                                                                                 |
| 19 | Ratio CD4 <sup>+</sup> vs. Treg                                                                          |
| 20 | Ratio CD4 <sup>+</sup> vs. Treg CTLA-4 <sup>+</sup>                                                      |
| 21 | Ratio CD8 <sup>+</sup> vs. Treg                                                                          |
| 22 | Ratio CD8 <sup>+</sup> vs. TregCTLA-4 <sup>+</sup>                                                       |
| 23 | NK cells= CD56 <sup>+</sup> CD3 <sup>-</sup>                                                             |
| 24 | NK Tim-3 <sup>+</sup>                                                                                    |
| 25 | NK CD16 <sup>+</sup> CD56 <sup>br</sup>                                                                  |
| 26 | NK CD16 <sup>+</sup> CD56 <sup>br</sup> Tim-3 <sup>+</sup>                                               |
| 27 | NK CD16 <sup>+</sup> CD56 <sup>dim</sup>                                                                 |
| 28 | NK CD16 <sup>+</sup> CD56 <sup>dim</sup> Tim-3 <sup>+</sup>                                              |
| 29 | NK CD16 <sup>-</sup> CD56 <sup>br</sup>                                                                  |
| 30 | NK CD16 <sup>+</sup> CD56 <sup>br</sup> Tim-3 <sup>+</sup>                                               |
| 31 | MDSC= CD33 <sup>+</sup> HLA-DR <sup>-</sup> CD11b <sup>+</sup>                                           |

### Supplemental Table 3: TIL Counts by Digital Immunohistochemistry

| Patient    | CD4 x10 <sup>-3</sup> /μm <sup>2</sup> |                       |                       | CD8x10 <sup>-3</sup> /μm <sup>2</sup> |                       |                       |
|------------|----------------------------------------|-----------------------|-----------------------|---------------------------------------|-----------------------|-----------------------|
|            | pre                                    | Post                  | Fold change           | pre                                   | post                  | Fold change           |
| 1          | 0.015                                  | 0.494                 | 32.72                 | 0.169                                 | 0.719                 | 4.25                  |
| 2          | 0.100                                  | 1.130                 | 11.32                 | 0.115                                 | 0.266                 | 2.31                  |
| 3          | 1.770                                  | 3.130                 | 1.77                  | 1.360                                 | 2.140                 | 1.57                  |
| 4          | -                                      | 3.640                 | -                     | -                                     | 1.720                 | -                     |
| 5          | 0.109                                  | 2.330                 | 21.38                 | 0.121                                 | 1.860                 | 15.37                 |
| 6          | 0.807                                  | 3.000                 | 3.72                  | 0.331                                 | 1.980                 | 5.98                  |
| 7          | 0.458                                  | 1.770                 | 3.86                  | 0.238                                 | 1.360                 | 5.71                  |
| 8          | -                                      | 1.550                 | -                     | -                                     | 0.870                 | -                     |
| 9          | -                                      | 4.320                 | -                     | 0.530                                 | 4.880                 | 9.21                  |
| 10         | 0.338                                  | 1.060                 | 3.14                  | 0.630                                 | 0.181                 | 2.87                  |
| 11         | -                                      | -                     | -                     | -                                     | 1.400                 | -                     |
| 12         | -                                      | 3.300                 | -                     | -                                     | 3.370                 | -                     |
| 13         | 0.095                                  | 4.350                 | 45.98                 | 0.256                                 | 3.760                 | 14.69                 |
| 14         | -                                      | 1.180                 | -                     | -                                     | 0.776                 | -                     |
| 15         | -                                      | -                     | -                     | -                                     | -                     | -                     |
| 16         | 1.250                                  | 3.76                  | 3.01                  | 0.770                                 | 1.280                 | 1.66                  |
| 17         | 0.038                                  | 0.424                 | 11.22                 | 0.079                                 | 0.727                 | 9.20                  |
| 18         | -                                      | 1.400                 | -                     | -                                     | 1.760                 | -                     |
| 19         | -                                      | -                     | -                     | -                                     | -                     | -                     |
| 20         | 0.023                                  | 1.000                 | 44.22                 | 0.081                                 | 0.858                 | 10.55                 |
| 21         | 0.258                                  | 2.460                 | 9.53                  | 0.161                                 | 1.950                 | 12.11                 |
| <b>No.</b> | <b>12<sup>a</sup></b>                  | <b>18<sup>a</sup></b> | <b>12<sup>b</sup></b> | <b>13<sup>a</sup></b>                 | <b>19<sup>a</sup></b> | <b>13<sup>b</sup></b> |

**a:** number of prostate biopsies analyzed by digital IHC.  
**b:** number of prostate biopsies for the analysis of pre- vs. post-vaccine comparison.
